# Supplementary material for: CRISPR-mediated multiplexed live cell imaging of nonrepetitive genomic loci with one guide RNA per locus
Source: PubMed Central journal article supplement (PMC8987088; doi:10.1038/s41467-022-29343-z), 2022-04-06
Supplement: 41467_2022_29343_MOESM1_ESM.pdf [file 41467_2022_29343_MOESM1_ESM.pdf]

**CRISPR-mediated multiplexed live cell imaging of nonrepetitive  
genomic loci with one guide RNA per locus**

Supplementary Information

Clow *et al.*

**Supplementary Table 1. Comparison of Casilio with published CRISPR-based imaging systems for visualizing endogenous unmodified genomic loci.**

| <b>Reference in main text</b> | <b>Composition</b>               | <b>Minimal number of gRNAs for non-repeat imaging</b> | <b>Number of colors</b> |
|-------------------------------|----------------------------------|-------------------------------------------------------|-------------------------|
| Chen 2013 <sup>14</sup>       | dCas9-EGFP                       | 36                                                    | 1                       |
| Tanenbaum 2014 <sup>15</sup>  | dCas9:SunTag <sub>24x</sub> :GFP | N.A. (only repeats)                                   | 1                       |
| Ma 2016 <sup>16</sup>         | dCas9:MS2/PP7/boxB:FP            | N.A. (only repeats)                                   | 3 <sup>a</sup>          |
| Qin 2017 <sup>17</sup>        | dCas9:16xMS2:mCherry             | 4                                                     | 1                       |
| Ma 2018 <sup>18</sup>         | dCas9:8xMS2/PP7:FP               | N.A. (only repeats)                                   | 2                       |
| Maas 2018 <sup>19</sup>       | dCas9:MS2/PP7:FP                 | 2 <sup>b</sup>                                        | 2                       |
| Gu 2018 <sup>20</sup>         | dCas9-EGFP                       | 12                                                    | 1                       |
| Wang 2019 <sup>21</sup>       | dCas9:gRNA-Cy3                   | N.A. (only repeats)                                   | 2                       |
| Mao 2019 <sup>22</sup>        | dCas9:gRNA:MB(FRET)              | 3                                                     | 1                       |
| Casilio (this study)          | dCas9:PUF:FP                     | 1                                                     | 3                       |

<sup>a</sup>Using combination of 3 colors, co-imaging of a maximum of 6 loci was demonstrated. However, this relies on color combination. When labeling very close-by loci, deconvolution of color combinations may become a challenge.

<sup>b</sup>More than expected number of spots observed, requiring elaborate filtering algorithm keeping two brightest spots (see supplementary figure 3 of that reference).

**Supplementary Table 2. Listing of Plasmids with links to plasmid maps and Addgene.**

| <b>Code</b> | <b>Plasmid Name</b>    | <b>Plasmid map on Benchling</b>                                                                                                                                       | <b>Addgene Link</b>                                                 |
|-------------|------------------------|-----------------------------------------------------------------------------------------------------------------------------------------------------------------------|---------------------------------------------------------------------|
| pAC11001    | lenti_dCas9            | <a href="https://benchling.com/s/seq-nwhb6COmj4HyvRDaltcT?m=slm-0GaEau5AEgsDsPVvBi9D">https://benchling.com/s/seq-nwhb6COmj4HyvRDaltcT?m=slm-0GaEau5AEgsDsPVvBi9D</a> | <a href="https://addgene.org/183208">https://addgene.org/183208</a> |
| pAC1447     | pmax-Clover_PUFc       | <a href="https://benchling.com/s/seq-DjznMYu2SHLIVqh8JjQ3?m=slm-XhF9XSW3mbTfMEgZzO4W">https://benchling.com/s/seq-DjznMYu2SHLIVqh8JjQ3?m=slm-XhF9XSW3mbTfMEgZzO4W</a> | <a href="https://addgene.org/73689">https://addgene.org/73689</a>   |
| pAC11002    | pmax-PUF9R_iRFP670     | <a href="https://benchling.com/s/seq-ymk2raAqiMP1wZEIDtmX?m=slm-XLBZX3AQozvu2RDxWiUi">https://benchling.com/s/seq-ymk2raAqiMP1wZEIDtmX?m=slm-XLBZX3AQozvu2RDxWiUi</a> | <a href="https://addgene.org/183209">https://addgene.org/183209</a> |
| pAC11003    | pmax-PUF9R_mRuby2      | <a href="https://benchling.com/s/seq-05CQGYUdjnefm6nwJrkl?m=slm-meYSbUjvCBrc744J7tSZ">https://benchling.com/s/seq-05CQGYUdjnefm6nwJrkl?m=slm-meYSbUjvCBrc744J7tSZ</a> | <a href="https://addgene.org/183210">https://addgene.org/183210</a> |
| pAC11004    | pmax-Clover_PUF48107   | <a href="https://benchling.com/s/seq-fRaBdNkydw9dDeyowhdd?m=slm-rDks2uTpsak4mVz0w3MI">https://benchling.com/s/seq-fRaBdNkydw9dDeyowhdd?m=slm-rDks2uTpsak4mVz0w3MI</a> | <a href="https://addgene.org/183211">https://addgene.org/183211</a> |
| pAC11005    | pmax-iRFP670_PUFc      | <a href="https://benchling.com/s/seq-6tmSjU4WcZpzy03YcpEv?m=slm-eDyvA9z21iWDM1HU8IH1">https://benchling.com/s/seq-6tmSjU4WcZpzy03YcpEv?m=slm-eDyvA9z21iWDM1HU8IH1</a> | <a href="https://addgene.org/183212">https://addgene.org/183212</a> |
| pAC11006    | pCR8-sgRNA-15xPBSc     | <a href="https://benchling.com/s/seq-XFhAw0mDVUoNViBilYlH?m=slm-BkR0AYIqz45RygiksM1X">https://benchling.com/s/seq-XFhAw0mDVUoNViBilYlH?m=slm-BkR0AYIqz45RygiksM1X</a> | <a href="https://addgene.org/183213">https://addgene.org/183213</a> |
| pAC11007    | pCR8-sgRNA-15xPBS9R    | <a href="https://benchling.com/s/seq-mj21Noq9avBms6Ooa31D?m=slm-nQbglQHY0PjDh1r1EVTT">https://benchling.com/s/seq-mj21Noq9avBms6Ooa31D?m=slm-nQbglQHY0PjDh1r1EVTT</a> | <a href="https://addgene.org/183214">https://addgene.org/183214</a> |
| pAC11008    | pCR8-sgRNA-20xPBS48107 | <a href="https://benchling.com/s/seq-BMHoDIBHYEfLM9Meyp4p?m=slm-L00jM5Knz4LpNvSFSG6Y">https://benchling.com/s/seq-BMHoDIBHYEfLM9Meyp4p?m=slm-L00jM5Knz4LpNvSFSG6Y</a> | <a href="https://addgene.org/183215">https://addgene.org/183215</a> |
| pAC11009    | pCR8-sgRNA-20xPBSc     | <a href="https://benchling.com/s/seq-MHL6lsmXICnDbdldVjFD?m=slm-1gbixcNOTO25ngnYOhYo">https://benchling.com/s/seq-MHL6lsmXICnDbdldVjFD?m=slm-1gbixcNOTO25ngnYOhYo</a> | <a href="https://addgene.org/183216">https://addgene.org/183216</a> |
| pAC11010    | pCR8-sgRNA-25xPBS9R    | <a href="https://benchling.com/s/seq-fOBZj7IIuZjAoxDEy44I?m=slm-17OYnvymuAzct16VuTes">https://benchling.com/s/seq-fOBZj7IIuZjAoxDEy44I?m=slm-17OYnvymuAzct16VuTes</a> | <a href="https://addgene.org/183217">https://addgene.org/183217</a> |

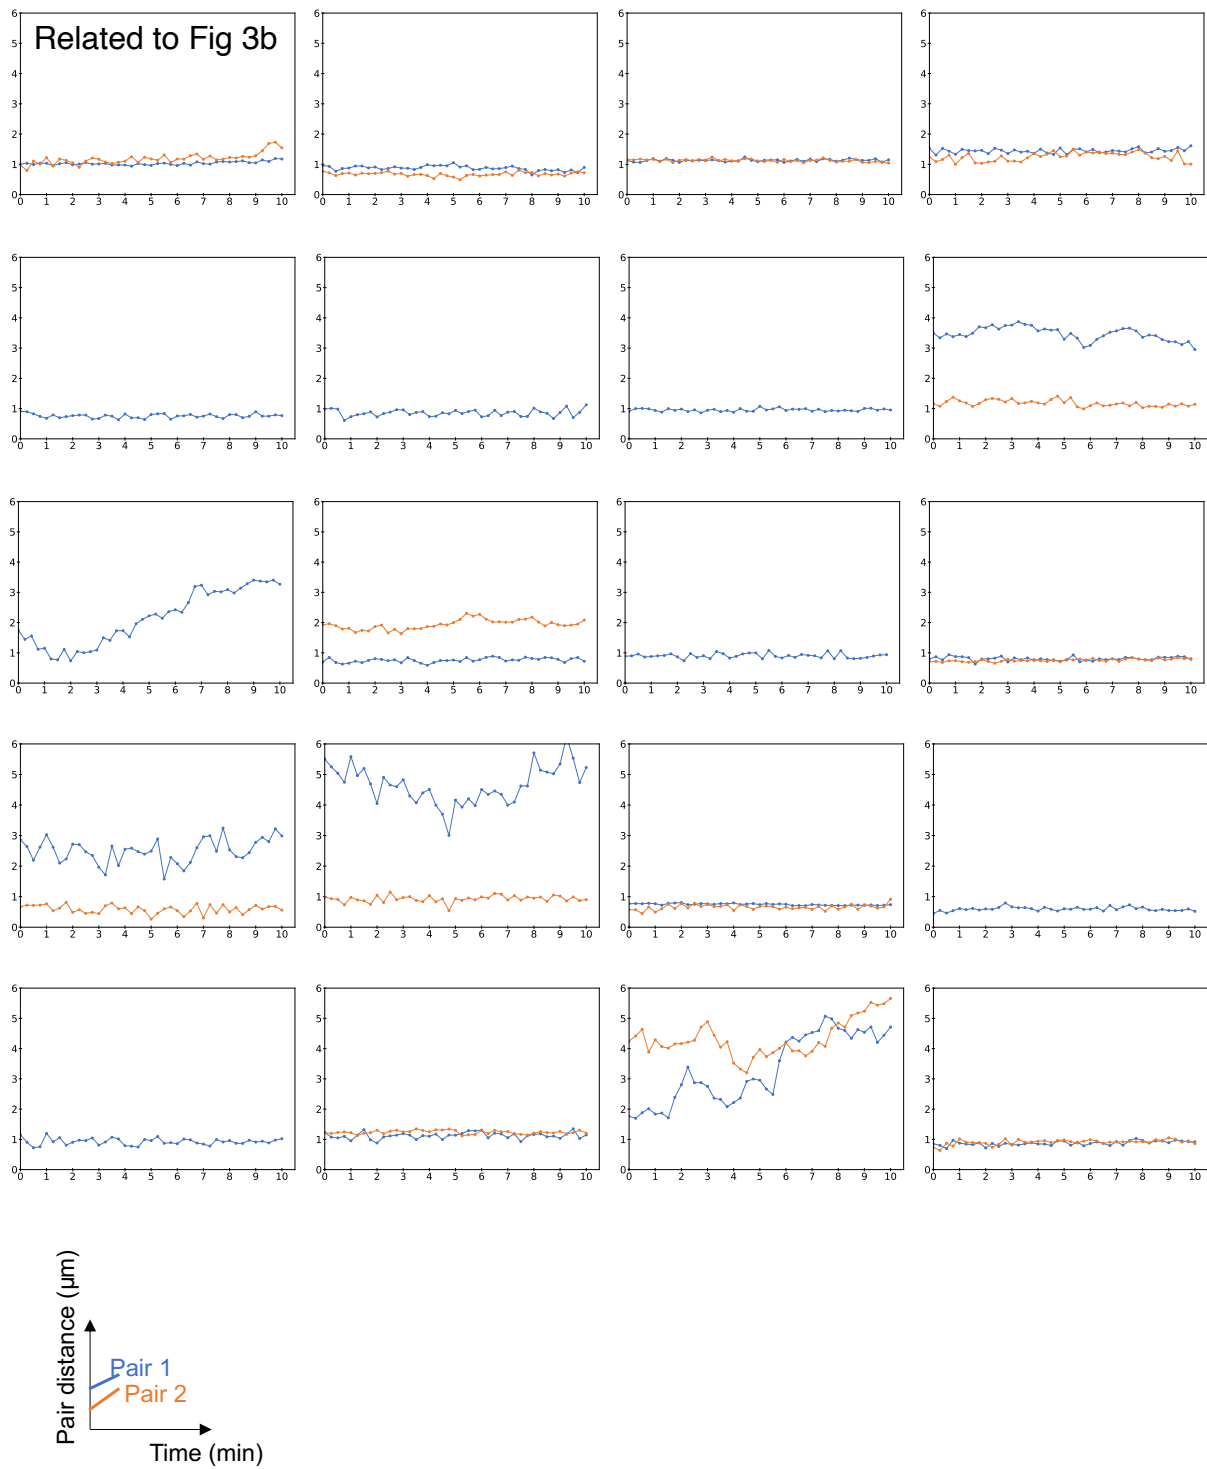

**Supplementary Fig. 1.** Pairwise 3D distances of Clover and iRFP670 foci labeling the *MASP1-BCL6* loop in 20 ARPE-19 nuclei (33 pairs) over time. Source data are provided as a Source Data file.

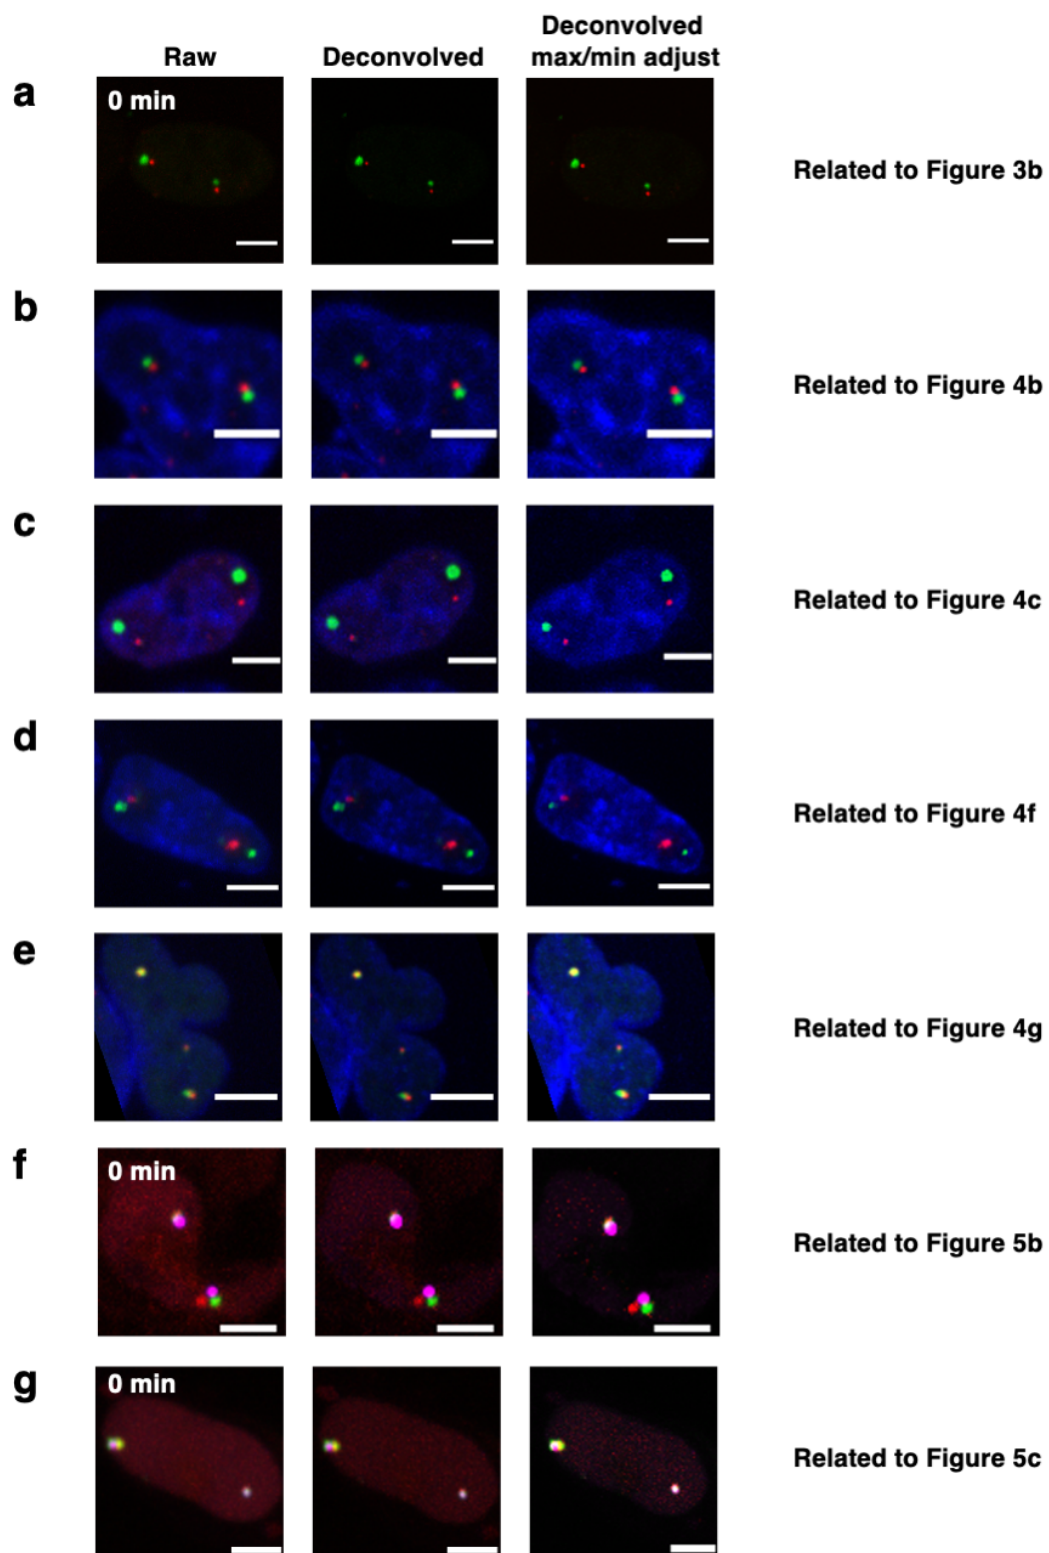

Supplementary Fig. 2. Example images through each step of image processing.

**a**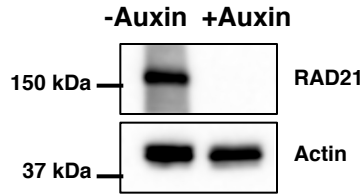**b**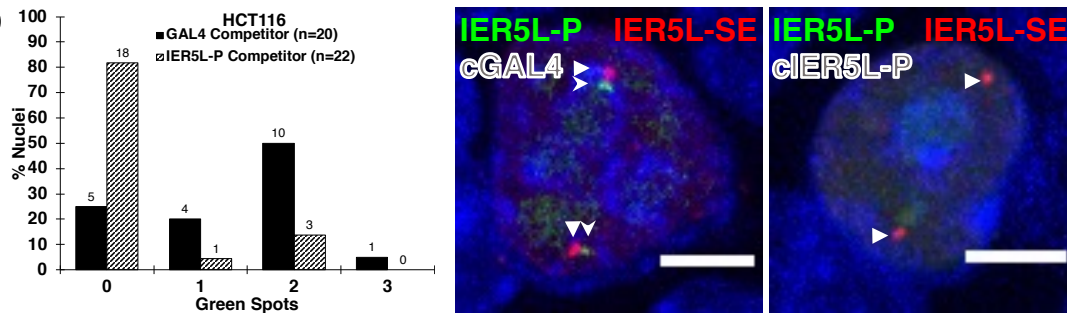

**Supplementary Fig 3. (a)** RAD21 and actin immunoblot of HCT116/RAD21-mAID cell extracts without and with auxin treatment. Experiment repeated 3 times. **(b)** Competitor experiments for validating *IER5L* P-SE labeling. Column plots show percentages of nuclei with the indicated numbers of Clover (green) spots (counts shown on top of columns) in HCT116 cells co-transfected with Clover-PUFc/gIER5L-P-15xPBSc, PUF9R-iRFP670/gIER5L-SE-15xBPS9R and either a non-competing GAL4 gRNA (black columns) or a gRNA competing with the IER5L-P (patterned columns). Representative images in the non-competed or competed samples (Clover, green spots and stealth arrowheads; iRFP670, red spots and triangle arrowheads) are shown to the right. Scale bars, 5  $\mu\text{m}$ . Experiment repeated 3 times. Source data are provided as a Source Data file.

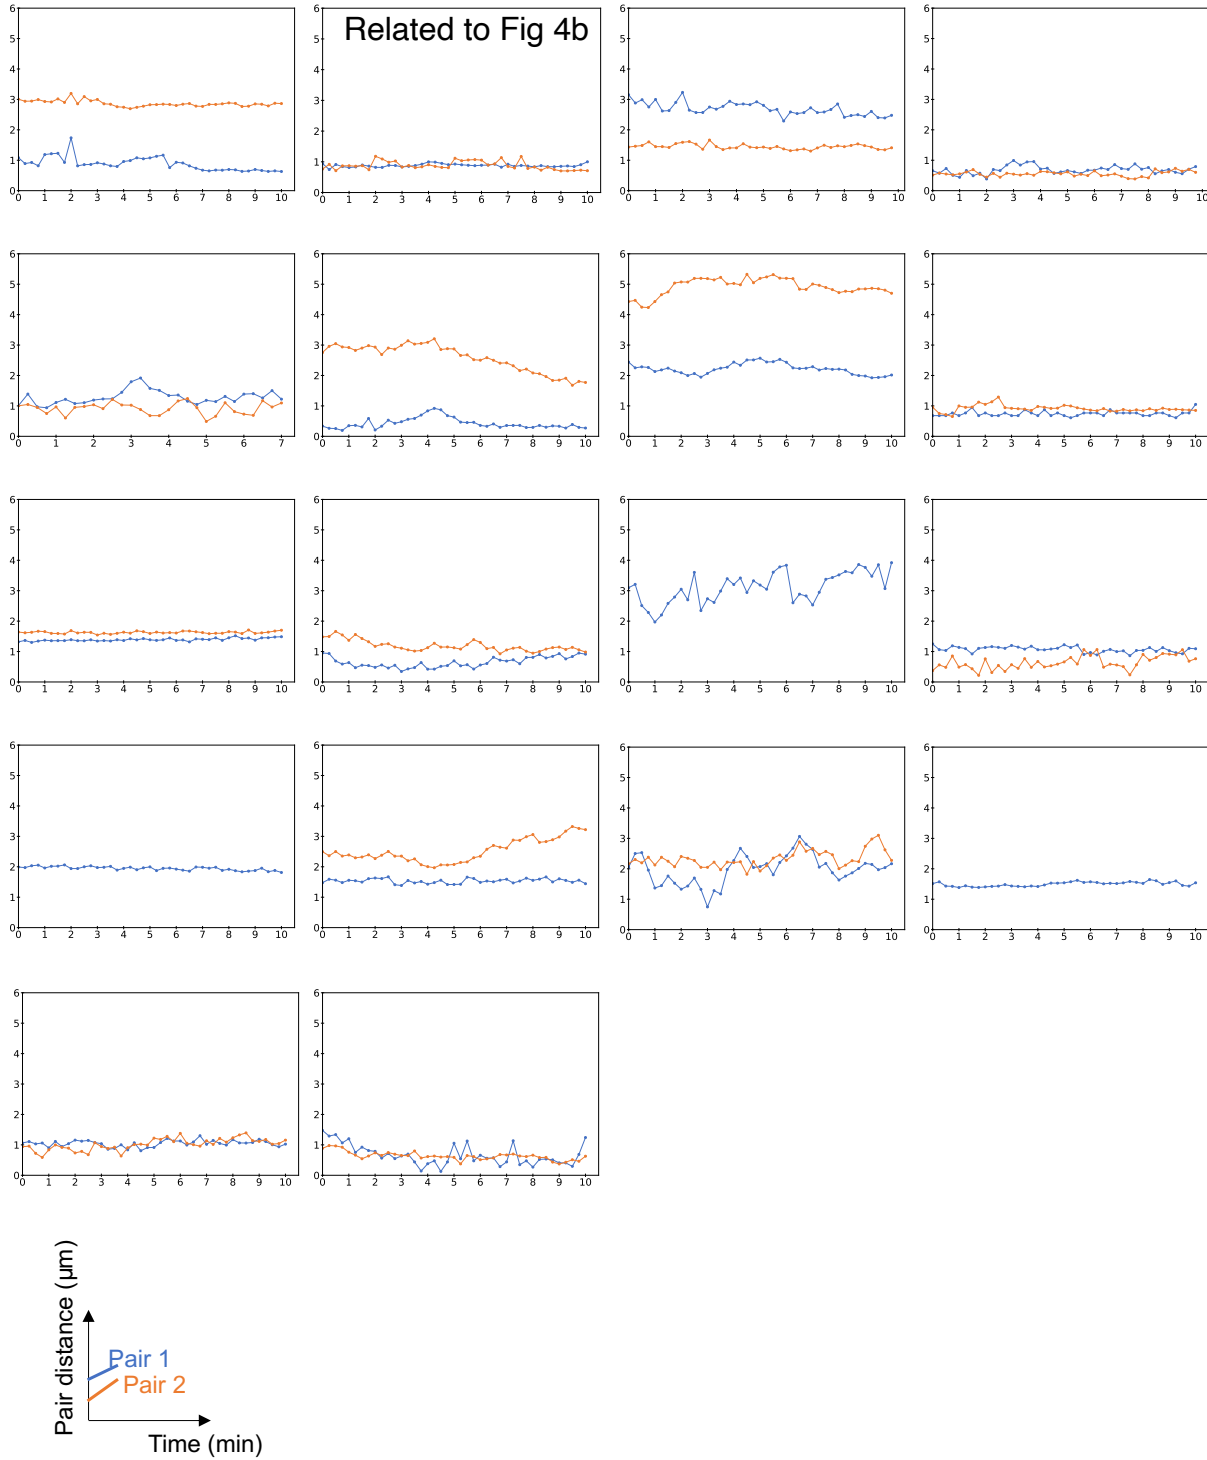

**Supplementary Fig. 4.** Pairwise 3D distances of Clover and iRFP670 foci labeling the *IER5L*-P locus and *IER5L*-SE locus in 18 nuclei (33 pairs) of untreated HCT116/RAD21-mAID cells over time. Source data are provided as a Source Data file.

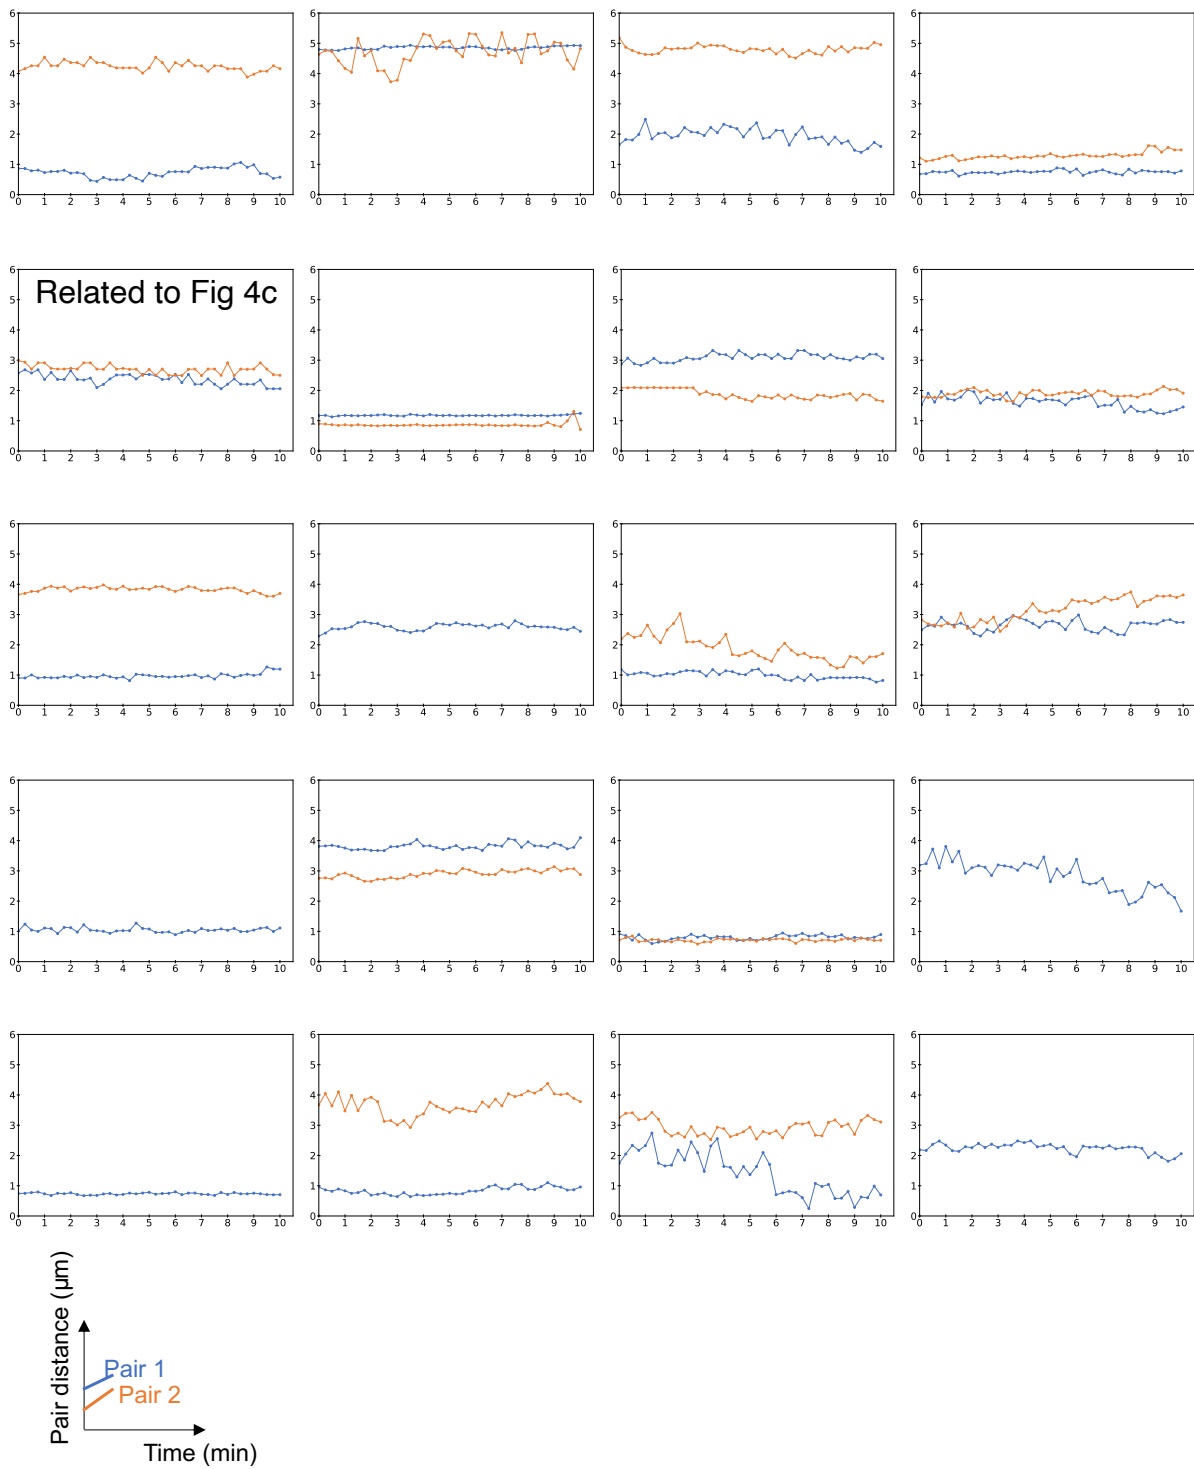

**Supplementary Fig. 5.** Pairwise 3D distances of Clover and iRFP670 foci labeling the *IER5L*-P locus and *IER5L*-SE locus in 20 nuclei (35 pairs) of auxin-treated HCT116/RAD21-mAID cells over time. Source data are provided as a Source Data file.



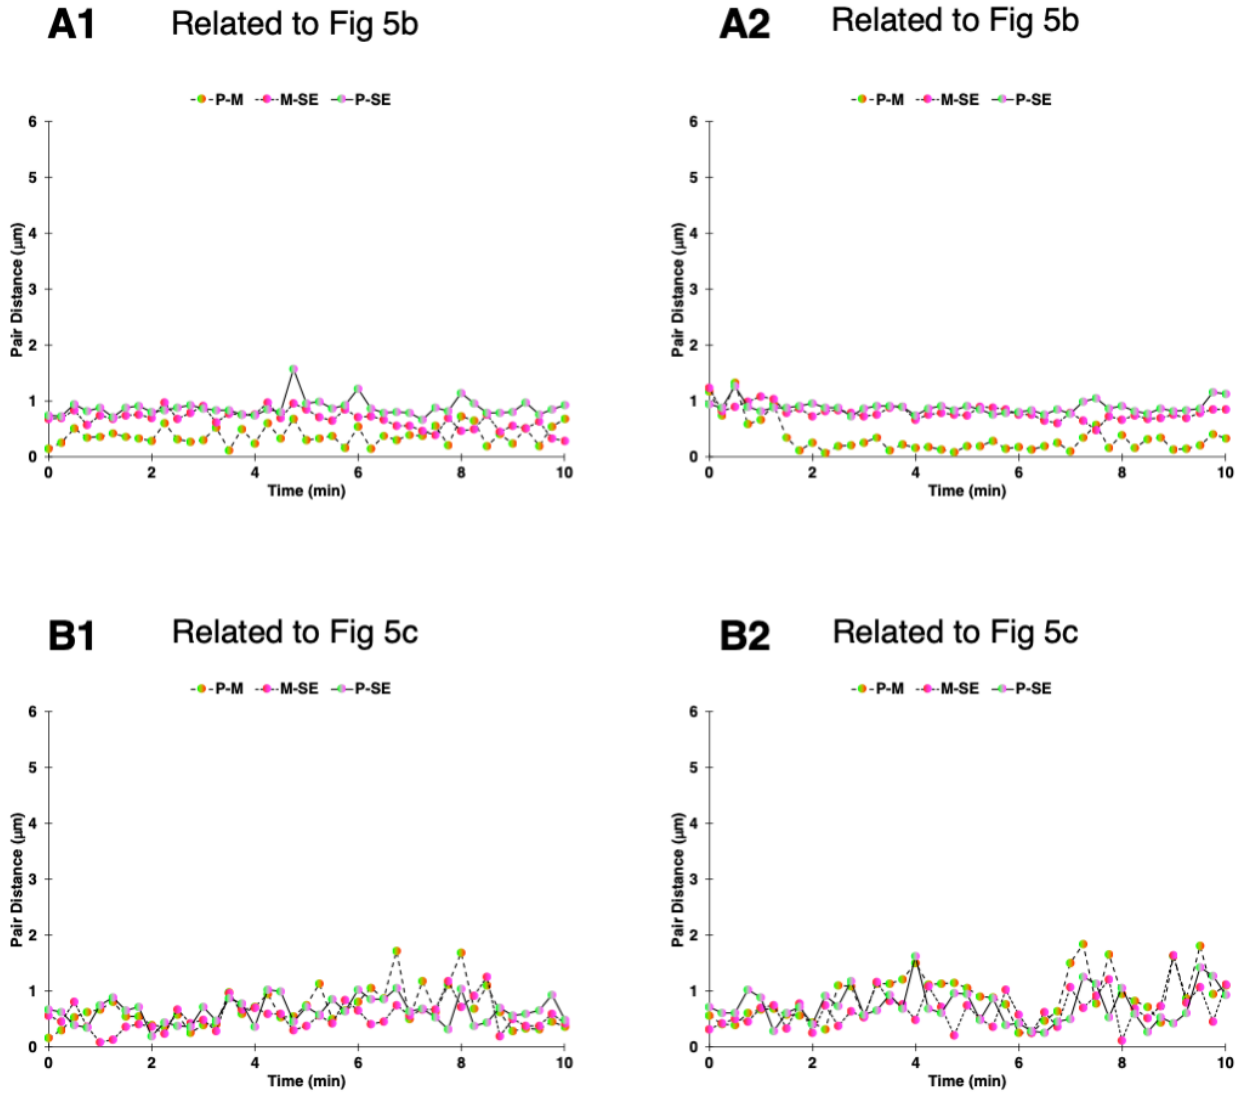

**Supplementary Fig. 6.** All combinations of pairwise 3D distances of Clover (locus P), iRFP670 (locus M) and mRuby2 (locus SE) spots on the *IER5L* P-SE loop in 10 HCT116/RAD21-mAID nuclei (15 alleles) over time. Source data are provided as a Source Data file.

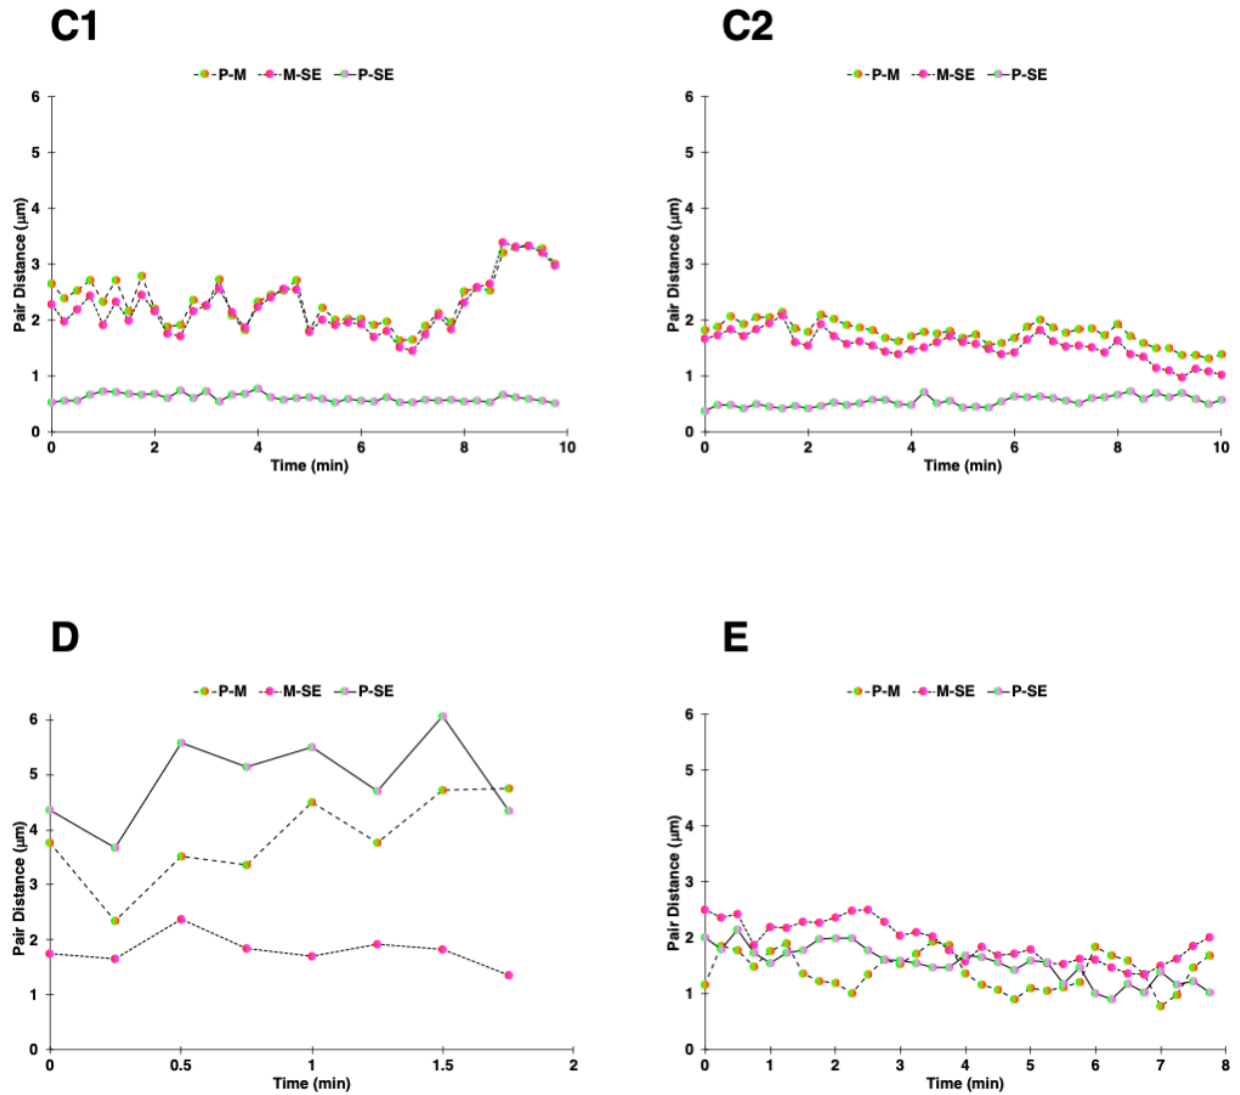

**Supplementary Fig. 6 (continued).** All combinations of pairwise 3D distances of Clover (locus P), iRFP670 (locus M) and mRuby2 (locus SE) spots on the *IER5L* P-SE loop in 10 HCT116/RAD21-mAID nuclei (15 alleles) over time. Source data are provided as a Source Data file.

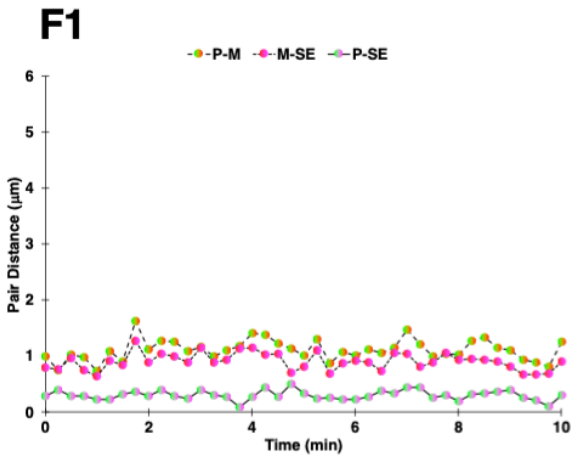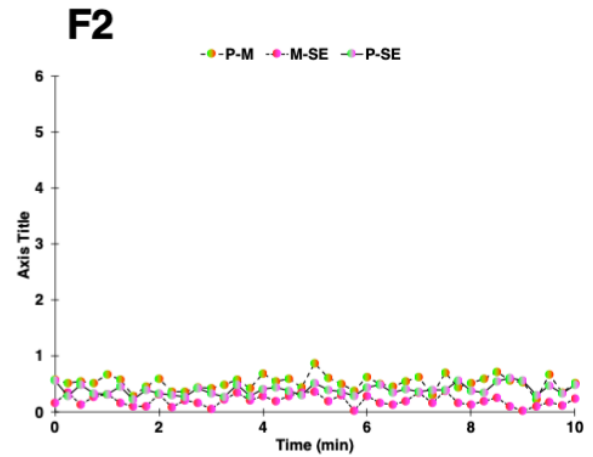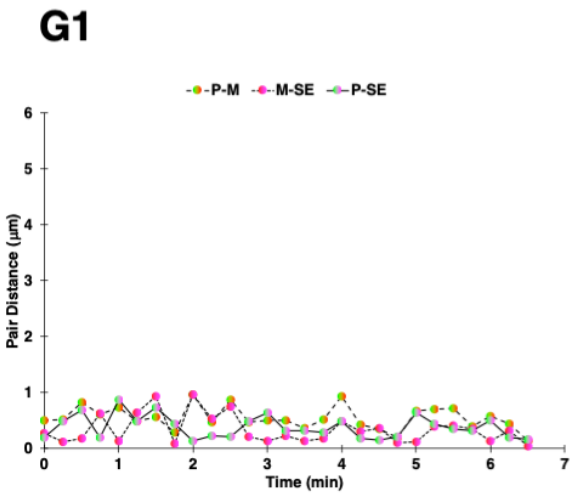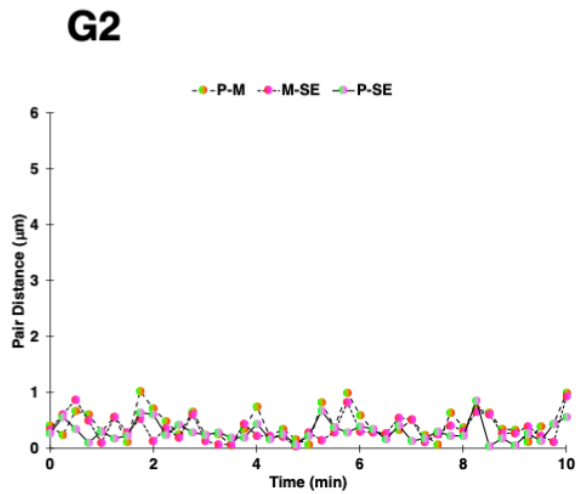

**Supplementary Fig. 6 (continued).** All combinations of pairwise 3D distances of Clover (locus P), iRFP670 (locus M) and mRuby2 (locus SE) spots on the *IER5L* P-SE loop in 10 HCT116/RAD21-mAID nuclei (15 alleles) over time. Source data are provided as a Source Data file.

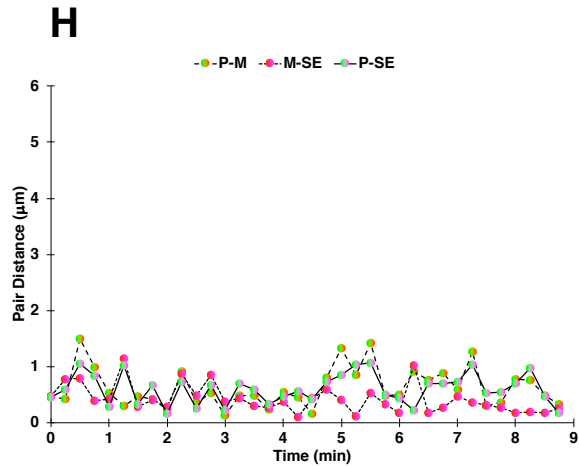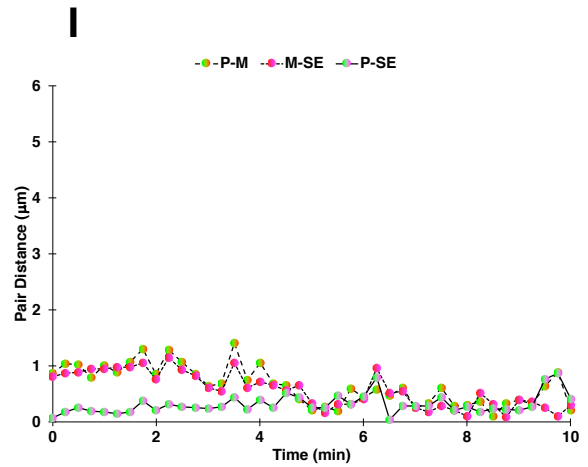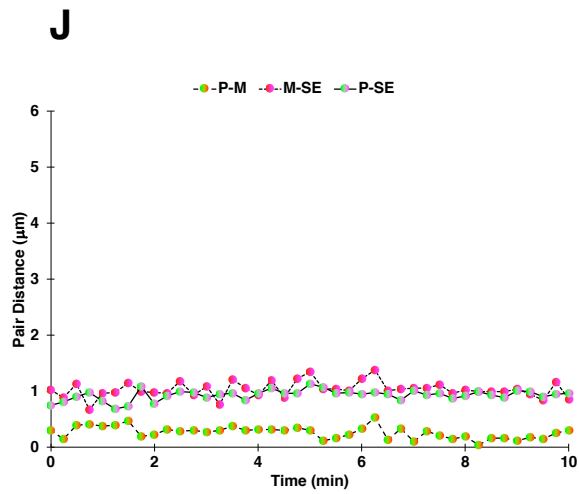

**Supplementary Fig. 6 (continued).** All combinations of pairwise 3D distances of Clover (locus P), iRFP670 (locus M) and mRuby2 (locus SE) spots on the *IER5L* P-SE loop in 10 HCT116/RAD21-mAID nuclei (15 alleles) over time. Source data are provided as a Source Data file.
