# Supplementary material for: CRISPR-mediated multiplexed live cell imaging of nonrepetitive genomic loci with one guide RNA per locus
Source: PubMed Central journal article supplement (PMC8987088; doi:10.1038/s41467-022-29343-z), 2022-04-06
Supplement: 41467_2022_29343_MOESM4_ESM.pdf [file 41467_2022_29343_MOESM4_ESM.pdf]

### **Title: Supplementary Video 1**

**Description:** Time-lapse video of a representative ARPE-19 nucleus visualized by Casilio labeling the *MASP1-BCL6* loop 5' and 3' anchors with Clover (green) and iRFP670 (red), respectively. Top panels, from left to right: Clover (green), iRFP670 (red), merged (scale bar, 5  $\mu\text{m}$ ), blue and orange panels correspond to boxed areas of the merged image (scale bars, 1  $\mu\text{m}$ ). Lower panel shows the pairwise distance (y-axis,  $\mu\text{m}$ ) with line colors corresponding to the boxed pairs (x-axis, minutes). Related to Fig. 3b.

### **Title: Supplementary Video 2**

**Description:** Time-lapse video of representative untreated HCT116/RAD21-mAID nuclei visualized by Casilio labeling the *IER5L* promoter with Clover (green) and *IER5L* super-enhancer with iRFP670 (red), respectively. Top panels, from left to right: Clover (green), iRFP670 (red), merged (scale bar, 5  $\mu\text{m}$ ), blue and orange panels correspond to boxed areas of the merged image (scale bars, 1  $\mu\text{m}$ ). Lower panel shows the pairwise distance (y-axis,  $\mu\text{m}$ ) with line colors corresponding to the boxed pairs (x-axis, minutes). Related to Fig. 4b.

### **Title: Supplementary Video 3**

**Description:** Time-lapse video of representative auxin-treated HCT116/RAD21-mAID nuclei visualized by Casilio labeling the *IER5L* promoter with Clover (green) and *IER5L* super-enhancer with iRFP670 (red), respectively. Top panels, from left to right: Clover (green), iRFP670 (red), merged (scale bar, 5  $\mu\text{m}$ ), blue and orange panels correspond to boxed areas of the merged image (scale bars, 1  $\mu\text{m}$ ). Lower panel shows the pairwise distance (y-axis,  $\mu\text{m}$ ) with line colors corresponding to the boxed pairs (x-axis, minutes). Related to Fig. 4c.

### **Title: Supplementary Video 4**

**Description:** Time-lapse video of representative untreated HCT116/RAD21-mAID nuclei visualized by Casilio labeling a RAD21-independent loop. Top panels, from left to right: Clover (green), iRFP670 (red), merged (scale bar, 5  $\mu\text{m}$ ), blue and orange panels correspond to boxed areas of the merged image (scale bars, 1  $\mu\text{m}$ ). Lower panel shows the pairwise distance (y-axis,  $\mu\text{m}$ ) with line colors corresponding to the boxed pairs (x-axis, minutes). Related to Fig. 4f.

### **Title: Supplementary Video 5**

**Description:** Time-lapse video of representative auxin-treated HCT116/RAD21-mAID nuclei visualized by Casilio labeling a RAD21-independent loop. Top panels, from left to right: Clover (green), iRFP670 (red), merged (scale bar, 5  $\mu\text{m}$ ), blue, orange and yellow panels correspond to boxed areas of the merged image (scale bars, 1  $\mu\text{m}$ ). Lower panel shows the pairwise distance (y-axis,  $\mu\text{m}$ ) with line colors corresponding to the boxed pairs (x-axis, minutes). Related to Fig. 4g.

### **Title: Supplementary Videos 6**

**Description:** PISCES – 3-color 3-point live-cell time-lapse imaging of the *IER5L* promoter-super enhancer loop with promoter, mid-point, super-enhancer labeled by Clover (green, first left panel), iRFP670 (red, second panel), and mRuby2 (magenta, third panel). Right panel shows merged image. Scale bars, 5  $\mu\text{m}$ . Related to Fig. 5b.

### **Title: Supplementary Videos 7**

**Description:** PISCES – 3-color 3-point live-cell time-lapse imaging of the *IER5L* promoter-super enhancer loop with promoter, mid-point, super-enhancer labeled by Clover (green, first left panel), iRFP670 (red, second panel), and mRuby2 (magenta, third panel). Right panel shows merged image. Scale bars, 5  $\mu$ m. Related to Fig. 5c.
